# Supplementary material for: The puzzling hyper-fine structure and an accurate equilibrium geometry of succinic anhydride
Source: Royal Society of Chemistry journal article supplement (doi:10.1039/c9cp06775b), 2020-01-01
Supplement: c9cp06775b1.pdf [file c9cp06775b1.pdf]

Table S1 Unsplit rotational transitions of succinic anhydride/MHz

| $J'_{K^-,K^+} \leftarrow J''_{K^-,K^+}$ | $\nu_{\text{obs}}$ | $\nu_{\text{obs-cal}}$ | $J'_{K^-,K^+} \leftarrow J''_{K^-,K^+}$ | $\nu_{\text{obs}}$ | $\nu_{\text{obs-cal}}$ |
|-----------------------------------------|--------------------|------------------------|-----------------------------------------|--------------------|------------------------|
| $3_{1,2} \leftarrow 3_{0,3}$            | 6119.81822         | -0.0002                | $6_{3,3} \leftarrow 6_{2,4}$            | 16828.68165        | 0.00242                |
| $1_{1,1} \leftarrow 0_{0,0}$            | 7660.93401         | 0.002                  | $7_{1,6} \leftarrow 7_{0,7}$            | 17008.68613        | -0.00370               |
| $4_{1,3} \leftarrow 4_{0,4}$            | 7929.39046         | -0.00016               | $4_{1,4} \leftarrow 3_{0,3}$            | 17273.59277        | -0.00044               |
| $6_{2,4} \leftarrow 5_{3,3}$            | 8473.28654         | 0.00060                | $5_{0,5} \leftarrow 4_{1,4}$            | 17546.65900        | 0.00076                |
| $3_{0,3} \leftarrow 2_{1,2}$            | 8960.56240         | -0.00006               | $5_{3,2} \leftarrow 5_{2,3}$            | 17842.51776        | 0.00087                |
| $5_{2,3} \leftarrow 5_{1,4}$            | 9675.28696         | 0.00100                | $12_{3,9} \leftarrow 12_{2,10}$         | 18283.28521        | -0.00018               |
| $4_{2,2} \leftarrow 4_{1,3}$            | 9743.72100         | 0.00045                | $6_{1,5} \leftarrow 5_{2,4}$            | 18373.70993        | -0.00189               |
| $6_{2,4} \leftarrow 6_{1,5}$            | 10159.70306        | -0.00099               | $4_{3,1} \leftarrow 4_{2,2}$            | 18627.34325        | 0.00030                |
| $3_{2,1} \leftarrow 3_{1,2}$            | 10187.04214        | -0.00074               | $3_{3,0} \leftarrow 3_{2,1}$            | 19106.16474        | -0.00469               |
| $2_{2,0} \leftarrow 2_{1,1}$            | 10785.49689        | -0.00366               | $13_{4,9} \leftarrow 13_{3,10}$         | 19334.98685        | -0.00059               |
| $2_{1,2} \leftarrow 1_{0,1}$            | 11117.50860        | -0.00401               | $3_{3,1} \leftarrow 3_{2,2}$            | 19479.94700        | 0.00089                |
| $7_{2,5} \leftarrow 7_{1,6}$            | 11327.48039        | 0.00190                | $2_{2,1} \leftarrow 1_{1,0}$            | 19526.18679        | -0.00020               |
| $2_{2,1} \leftarrow 2_{1,2}$            | 12613.02947        | 0.00075                | $14_{4,10} \leftarrow 14_{3,11}$        | 19628.79601        | -0.00121               |
| $5_{1,4} \leftarrow 4_{2,3}$            | 12990.71956        | 0.00108                | $4_{3,2} \leftarrow 4_{2,3}$            | 19678.92210        | 0.00312                |
| $8_{2,6} \leftarrow 8_{1,7}$            | 13261.80368        | -0.00080               | $5_{3,3} \leftarrow 5_{2,4}$            | 20060.13008        | 0.00015                |
| $4_{0,4} \leftarrow 3_{1,3}$            | 13336.79834        | -0.00040               | $5_{1,5} \leftarrow 4_{0,4}$            | 20208.74598        | 0.00098                |
| $11_{4,7} \leftarrow 10_{5,6}$          | 13538.97817        | -0.00086               | $2_{2,0} \leftarrow 1_{1,1}$            | 20238.58007        | -0.00380               |
| $3_{2,2} \leftarrow 3_{1,3}$            | 13611.24297        | -0.00190               | $8_{2,6} \leftarrow 7_{3,5}$            | 20404.70040        | 0.00269                |
| $3_{1,3} \leftarrow 2_{0,2}$            | 14288.25250        | 0.00081                | $6_{3,4} \leftarrow 6_{2,5}$            | 20684.88300        | 0.00186                |
| $9_{3,6} \leftarrow 9_{2,7}$            | 14639.95440        | 0.00061                | $8_{1,7} \leftarrow 8_{0,8}$            | 20756.90665        | -0.00027               |
| $8_{3,5} \leftarrow 8_{2,6}$            | 14967.09567        | 0.00050                | $7_{2,6} \leftarrow 7_{1,7}$            | 21035.37603        | 0.00313                |
| $10_{3,7} \leftarrow 10_{2,8}$          | 15004.88317        | 0.00084                | $6_{0,6} \leftarrow 5_{1,5}$            | 21545.84690        | 0.00065                |
| $7_{3,4} \leftarrow 7_{2,5}$            | 15782.67793        | 0.00120                | $7_{3,5} \leftarrow 7_{2,6}$            | 21605.12106        | 0.00250                |
| $9_{2,7} \leftarrow 9_{1,8}$            | 15968.82285        | -0.00026               | $10_{4,6} \leftarrow 10_{3,7}$          | 22410.20227        | -0.00034               |
| $11_{3,8} \leftarrow 11_{2,9}$          | 16197.77576        | 0.00068                | $8_{3,6} \leftarrow 8_{2,7}$            | 22857.53869        | 0.00119                |
| $5_{2,4} \leftarrow 5_{1,5}$            | 16657.41244        | 0.00086                | $3_{2,2} \leftarrow 2_{1,1}$            | 22982.74632        | -0.00530               |

|                                  |             |          |                                  |             |          |
|----------------------------------|-------------|----------|----------------------------------|-------------|----------|
| $6_{1,6} \leftarrow 5_{0,5}$     | 23210.74753 | 0.00054  | $8_{7,1} \leftarrow 8_{6,2}$     | 50270.08000 | 0.04376  |
| $8_{2,7} \leftarrow 8_{1,8}$     | 23644.23025 | -0.00033 | $8_{7,2} \leftarrow 8_{6,3}$     | 50270.08000 | -0.06154 |
| $7_{1,6} \leftarrow 6_{2,5}$     | 23672.29881 | 0.00074  | $7_{7,0} \leftarrow 7_{6,1}$     | 50321.86200 | 0.03325  |
| $9_{4,5} \leftarrow 9_{3,6}$     | 23861.43718 | 0.00034  | $7_{7,1} \leftarrow 7_{6,2}$     | 50321.86200 | 0.01805  |
| $16_{7,9} \leftarrow 16_{6,10}$  | 48105.71100 | -0.02589 | $20_{4,17} \leftarrow 20_{3,18}$ | 50554.98100 | 0.01003  |
| $17_{7,11} \leftarrow 17_{6,12}$ | 48342.74900 | 0.00824  | $7_{3,4} \leftarrow 6_{2,5}$     | 50782.51000 | 0.05670  |
| $16_{7,10} \leftarrow 16_{6,11}$ | 48676.46400 | -0.02421 | $10_{3,8} \leftarrow 9_{2,7}$    | 51642.97700 | 0.03926  |
| $15_{7,8} \leftarrow 15_{6,9}$   | 48729.67700 | -0.02823 | $6_{4,3} \leftarrow 5_{3,2}$     | 51692.00100 | 0.02039  |
| $16_{1,15} \leftarrow 16_{0,16}$ | 48743.27200 | 0.00566  | $6_{4,2} \leftarrow 5_{3,3}$     | 51871.23700 | 0.00275  |
| $16_{2,15} \leftarrow 16_{1,16}$ | 48780.10000 | -0.05736 | $17_{1,16} \leftarrow 17_{0,17}$ | 52043.90400 | 0.00934  |
| $15_{7,9} \leftarrow 15_{6,10}$  | 49006.37500 | -0.02039 | $17_{2,16} \leftarrow 17_{1,17}$ | 52063.18300 | -0.00307 |
| $14_{7,8} \leftarrow 14_{6,9}$   | 49308.40500 | -0.01982 | $14_{1,13} \leftarrow 13_{2,12}$ | 53151.99700 | -0.00219 |
| $13_{7,6} \leftarrow 13_{6,7}$   | 49517.83800 | -0.03758 | $11_{3,9} \leftarrow 10_{2,8}$   | 53357.37500 | 0.01271  |
| $13_{1,12} \leftarrow 12_{2,11}$ | 49556.35500 | 0.00248  | $15_{0,15} \leftarrow 14_{1,14}$ | 53482.35100 | 0.00339  |
| $13_{7,7} \leftarrow 13_{6,8}$   | 49569.93900 | -0.02617 | $15_{1,15} \leftarrow 14_{0,14}$ | 53487.43300 | -0.00062 |
| $13_{2,11} \leftarrow 12_{3,10}$ | 49611.68900 | -0.03178 | $14_{2,13} \leftarrow 13_{1,12}$ | 53527.55300 | 0.01236  |
| $18_{2,16} \leftarrow 18_{1,17}$ | 49621.55000 | -0.05282 | $7_{2,5} \leftarrow 6_{1,6}$     | 53692.12700 | 0.01555  |
| $20_{3,17} \leftarrow 20_{2,18}$ | 49666.03800 | -0.02396 | $15_{3,12} \leftarrow 14_{4,11}$ | 54118.26200 | -0.05237 |
| $9_{3,7} \leftarrow 8_{2,6}$     | 49812.26300 | -0.00568 | $14_{2,12} \leftarrow 13_{3,11}$ | 54354.35800 | -0.05717 |
| $18_{3,16} \leftarrow 18_{2,17}$ | 49837.56000 | -0.00128 | $19_{2,17} \leftarrow 19_{1,18}$ | 53020.20000 | 0.00880  |
| $14_{0,14} \leftarrow 13_{1,13}$ | 50023.85500 | -0.00619 | $19_{3,17} \leftarrow 19_{2,18}$ | 53140.51100 | -0.00859 |
| $14_{1,14} \leftarrow 13_{0,13}$ | 50034.19000 | 0.00430  |                                  |             |          |
| $10_{7,3} \leftarrow 10_{6,4}$   | 50093.10200 | 0.01948  |                                  |             |          |
| $10_{7,4} \leftarrow 10_{6,5}$   | 50095.12005 | -0.00539 |                                  |             |          |
| $9_{7,2} \leftarrow 9_{6,3}$     | 50195.85800 | -0.02419 |                                  |             |          |
| $9_{7,3} \leftarrow 9_{6,4}$     | 50196.37800 | -0.02370 |                                  |             |          |
| $13_{2,12} \leftarrow 12_{1,11}$ | 50233.33300 | 0.02248  |                                  |             |          |

Table S2 Microwave rotational transitions in succinic anhydride isotopologues/MHz

| Transition                          | <sup>13</sup> CH isotope |                      | <sup>13</sup> CO isotope |                      | <sup>18</sup> OCO isotope |                      | <sup>18</sup> OCOC isotope |                      |
|-------------------------------------|--------------------------|----------------------|--------------------------|----------------------|---------------------------|----------------------|----------------------------|----------------------|
|                                     | $v_{\text{obs}}$         | $v_{\text{obs-cal}}$ | $v_{\text{obs}}$         | $v_{\text{obs-cal}}$ | $v_{\text{obs}}$          | $v_{\text{obs-cal}}$ | $v_{\text{obs}}$           | $v_{\text{obs-cal}}$ |
| $J'_{K'K'} \leftarrow J''_{K''K''}$ |                          |                      |                          |                      |                           |                      |                            |                      |
| $1_{1,1} \leftarrow 0_{0,0}$        | 7530.52229               | -0.00134             | 7651.96950               | -0.00224             |                           |                      |                            |                      |
| $3_{0,3} \leftarrow 2_{1,2}$        | 8999.79565               | -0.00136             | 8883.75464               | -0.00021             | 8423.22881                | -0.00464             |                            |                      |
| $2_{1,2} \leftarrow 1_{0,1}$        | 10960.21065              | -0.00124             | 11093.11417              | -0.00083             |                           |                      |                            |                      |
| $4_{0,4} \leftarrow 3_{1,3}$        | 13337.11583              | -0.00052             | 13242.19145              | -0.00081             | 12656.01363               | -0.00726             |                            |                      |
| $3_{2,2} \leftarrow 3_{1,3}$        | 13313.43168              | 0.00136              | 13619.92051              | 0.00133              |                           |                      |                            |                      |
| $3_{1,3} \leftarrow 2_{0,2}$        | 14102.25641              | -0.00569             | 14250.92302              | -0.00131             | 13953.04970               | -0.00605             | 14119.04618                | 0.01671              |
| $4_{1,4} \leftarrow 3_{0,3}$        | 17062.03407              | 0.00203              | 17223.60101              | -0.00147             |                           |                      | 17084.62604                | 0.00387              |
| $5_{0,5} \leftarrow 4_{1,4}$        | 17498.04788              | 0.00109              | 17438.67775              | 0.00034              | 16750.34784               | -0.00879             |                            |                      |
| $5_{1,5} \leftarrow 4_{0,4}$        | 19979.28718              | 0.00213              | 20143.97210              | 0.00072              | 19662.09552               | -0.01178             | 20008.75807                | -0.01285             |
| $6_{0,6} \leftarrow 5_{1,5}$        | 21444.71340              | 0.00069              | 21427.21329              | 0.00037              | 20652.96390               | -0.01157             | 21498.42780                | 0.00103              |
| $6_{1,6} \leftarrow 5_{0,5}$        | 22970.76381              | 0.00021              | 23128.29642              | 0.00214              | 22534.47361               | -0.01275             |                            |                      |
| $9_{3,7} \leftarrow 8_{2,6}$        | 48938.59800              | -0.03342             | 49758.71100              | -0.00855             | 49109.06600               | -0.01539             |                            |                      |
| $7_{3,4} \leftarrow 6_{2,5}$        |                          |                      |                          |                      | 49382.53500               | 0.00263              |                            |                      |
| $13_{7,6} \leftarrow 13_{6,7}$      |                          |                      |                          |                      | 50073.03900               | -0.00695             |                            |                      |

|                                  |             |          |             |          |             |          |             |          |
|----------------------------------|-------------|----------|-------------|----------|-------------|----------|-------------|----------|
| $10_{3,8} \leftarrow 9_{2,7}$    | 50737.15200 | 0.00401  | 51587.16400 | 0.00836  | 50915.43000 | -0.00010 |             |          |
| $6_{4,3} \leftarrow 5_{3,2}$     | 50816.26200 | 0.00497  | 51631.11700 | -0.01059 | 50940.16800 | -0.03503 | 50842.82800 | -0.16770 |
| $6_{4,2} \leftarrow 5_{3,3}$     | 51012.46900 | 0.00236  | 51803.98000 | 0.00051  | 51082.25000 | 0.01129  | 51042.41000 | -0.15410 |
| $14_{1,13} \leftarrow 13_{2,12}$ | 52771.21900 | 0.01310  | 52904.62100 | -0.00863 | 51229.19100 | -0.02282 |             |          |
| $11_{3,9} \leftarrow 10_{2,8}$   | 52442.31600 | -0.00541 | 53292.99200 | -0.01793 | 52571.51200 | -0.00088 |             |          |
| $15_{0,15} \leftarrow 14_{1,14}$ |             |          |             |          | 51616.85900 | -0.00938 |             |          |
| $15_{1,15} \leftarrow 14_{0,14}$ | 53071.99600 | -0.03497 | 53249.02300 | -0.03678 | 51624.66400 | 0.02467  |             |          |
| $14_{2,13} \leftarrow 13_{1,12}$ |             |          |             |          | 51750.77000 | -0.00385 |             |          |
| $12_{3,10} \leftarrow 11_{2,9}$  | 54208.39800 | -0.00138 | 55020.27700 | -0.01258 | 54203.23000 | 0.01973  | 54247.13300 | 0.01979  |
| $14_{2,12} \leftarrow 13_{3,11}$ | 54253.27000 | -0.01151 | 54000.16800 | 0.00158  |             |          |             |          |
| $15_{11,4} \leftarrow 14_{2,13}$ |             |          |             |          | 54669.55100 | 0.01160  |             |          |
| $7_{4,4} \leftarrow 6_{3,3}$     | 54648.10500 | -0.00138 | 55486.53500 | -0.00942 | 54688.44900 | -0.01120 | 54681.06600 | -0.14979 |
| $16_{0,16} \leftarrow 15_{1,15}$ |             |          |             |          | 54954.12500 | 0.00359  | 56613.82000 | 0.01381  |
| $16_{1,16} \leftarrow 15_{0,15}$ |             |          |             |          | 54958.04700 | 0.00031  | 56615.70000 | 0.04099  |
| $7_{4,3} \leftarrow 6_{3,4}$     | 55230.96900 | 0.03778  | 56001.10900 | 0.00970  | 55112.30900 | 0.02229  | 55273.77700 | -0.08232 |
| $13_{3,11} \leftarrow 12_{2,10}$ | 56182.01200 | 0.00322  | 56915.11300 | 0.01359  | 55946.59000 | 0.02247  | 56235.50400 | 0.03970  |
| $9_{8,1} \leftarrow 9_{7,2}$     |             |          |             |          |             |          | 56335.40600 | 0.14871  |
| $8_{4,5} \leftarrow 7_{3,4}$     |             |          |             |          |             |          | 58231.57500 | -0.08229 |

|                                  |             |          |             |          |             |          |             |          |
|----------------------------------|-------------|----------|-------------|----------|-------------|----------|-------------|----------|
| $15_{2,14} \leftarrow 14_{1,13}$ | 56430.18000 | -0.01512 | 56643.73000 | -0.00753 | 54962.90600 | -0.03381 |             |          |
| $8_{4,5} \leftarrow 7_{3,4}$     | 58195.98400 | 0.02208  | 59084.25000 | -0.04427 | 58217.44500 | -0.01447 |             |          |
| $14_{3,12} \leftarrow 13_{2,11}$ |             |          |             |          | 57918.48800 | -0.01452 |             |          |
| $16_{1,15} \leftarrow 15_{2,14}$ |             |          |             |          | 58063.68400 | 0.00874  |             |          |
| $16_{2,15} \leftarrow 15_{1,14}$ |             |          |             |          | 58225.86300 | 0.00543  |             |          |
| $17_{0,17} \leftarrow 16_{1,16}$ |             |          |             |          | 58290.51600 | 0.00793  |             |          |
| $17_{1,17} \leftarrow 16_{0,16}$ |             |          |             |          | 58292.45700 | -0.02025 |             |          |
| $6_{5,2} \leftarrow 5_{4,1}$     | 58481.40200 | -0.05198 | 59517.71100 | 0.00827  |             |          |             |          |
| $6_{5,1} \leftarrow 5_{4,2}$     | 58485.65200 | 0.06306  | 59521.14500 | -0.01394 |             |          |             |          |
| $8_{4,4} \leftarrow 7_{3,5}$     | 59613.68800 | -0.02303 | 60340.86700 | -0.04003 | 59257.12500 | -0.00808 | 59672.35200 | -0.19423 |
| $9_{4,6} \leftarrow 8_{3,5}$     | 61329.10900 | 0.00024  | 62297.86700 | 0.00065  | 61412.00000 | 0.01153  | 61362.61700 | -0.14867 |
| $17_{1,16} \leftarrow 16_{2,15}$ |             |          |             |          | 61430.84400 | 0.01525  |             |          |
| $17_{2,16} \leftarrow 16_{1,15}$ |             |          |             |          | 61519.16400 | -0.00692 |             |          |
| $8_{5,4} \leftarrow 7_{4,3}$     |             |          |             |          | 66687.23400 | -0.05301 |             |          |
| $9_{4,5} \leftarrow 8_{3,6}$     | 64295.67600 | -0.01078 | 64942.94600 | 0.02268  | 63615.45300 | 0.03540  | 64375.67200 | -0.03293 |
| $8_{5,4} \leftarrow 7_{4,3}$     |             |          |             |          | 66687.23400 | -0.05301 |             |          |
| $8_{5,3} \leftarrow 7_{4,4}$     |             |          |             |          | 66736.18800 | 0.02240  |             |          |
| $10_{4,6} \leftarrow 9_{3,7}$    |             |          |             |          |             |          | 69570.99200 | 0.03461  |

Table S3. Semi-experimental equilibrium rotational constants and residuals of the fits (in MHz).

| Isotopologue       | Axis $g$ | $B_g$    | Exp – calc <sup>a</sup> | Exp – calc <sup>b</sup> | $d_{\text{HH}}$ <sup>c</sup> |
|--------------------|----------|----------|-------------------------|-------------------------|------------------------------|
| Parent             | $a$      | 5974.315 | 0.078                   | 0.078                   | 1.7576                       |
|                    | $b$      | 2377.984 | -0.005                  | -0.005                  |                              |
|                    | $c$      | 1737.358 | -0.002                  | -0.002                  |                              |
| <sup>13</sup> CH   | $a$      | 5856.019 | 0.000                   | 0.001                   | 1.7577                       |
|                    | $b$      | 2371.493 | 0.010                   | 0.010                   |                              |
|                    | $c$      | 1723.790 | 0.005                   | 0.005                   |                              |
| <sup>13</sup> CO   | $a$      | 5972.668 | -0.031                  | -0.031                  | 1.7576                       |
|                    | $b$      | 2363.613 | 0.019                   | 0.019                   |                              |
|                    | $c$      | 1729.535 | 0.000                   | 0.001                   |                              |
| <sup>18</sup> OCO  | $a$      | 5922.761 | -0.003                  | -0.003                  | 1.7580                       |
|                    | $b$      | 2273.315 | 0.006                   | 0.006                   |                              |
|                    | $c$      | 1676.717 | 0.003                   | 0.003                   |                              |
| <sup>18</sup> OCOC | $a$      | 5856.913 | 0.001                   | 0.001                   | 1.7577                       |
|                    | $b$      | 2377.959 | -0.030                  | -0.030                  |                              |

*c*      1727.292   -0.006      -0.006

---

<sup>a</sup> Fit with three predicates (mean of CCSD(T)\_AE/wCVQZ values): C-H = 1.0872(20) Å, C-C-H = 108.32(30)°, O-C-C-H = 121.73(30)°

<sup>b</sup> Fit with an additional fourth predicate: C-C = 1512(2) Å (CBS value).

<sup>c</sup> Non-bonded distance between the two out-of-plane hydrogen atoms derived from  $P_c$ .
